# Supplementary material for: Mutations of epigenetic regulatory genes are common in thymic carcinomas
Source: PubMed Central journal article supplement — Sci Rep. 2014 Dec 8;4:7336. doi: 10.1038/srep07336 (PMC4258655; doi:10.1038/srep07336), 2014-12-08
Supplement: srep07336-s1.pdf [file srep07336-s1.pdf]

## Supplementary Materials

### **Mutations of epigenetic regulatory genes are common in thymic carcinomas**

Yisong Wang<sup>1,2</sup>, Anish Thomas<sup>1</sup>, Christopher Lau<sup>1</sup>, Arun Rajan<sup>1</sup>, Yuelin Zhu<sup>1</sup>, J. Keith Killian<sup>1</sup>, Iacopo Petrini<sup>1</sup>, Trung Pham<sup>1</sup>, Betsy Morrow<sup>1</sup>, Xiaogang Zhong<sup>2</sup>, Paul S. Meltzer<sup>1</sup>, Giuseppe Giaccone<sup>1,2</sup>

<sup>1</sup>Center for Cancer Research, National Cancer Institute, Bethesda, MD 20892; <sup>2</sup>Lombardi Comprehensive Cancer Center, Georgetown University, Washington DC 20007

**Table S1.** List of 197 cancer-associated genes

---

|         |           |         |         |        |
|---------|-----------|---------|---------|--------|
| ABL1    | DKK3      | JAK2    | PTPN11  | VIM    |
| ACN9    | DLD       | JAK3    | RB1     | WT1    |
| ACVR1B  | DMBT1     | KDR     | REEP5   | WTS    |
| AKT1    | DNMT3A    | KIT     | RET     | XRCC1  |
| ALK     | DPYD      | KRAS    | RNF139  | ZNF135 |
| APC     | EGF       | KRT20   | RNF2    |        |
| ARHGEF2 | EGFR      | MAG11   | RPS15   |        |
| ARID1A  | EGR3      | MAP2K4  | RUNX1   |        |
| ASXL1   | EIF4G2    | MEN1    | SCLC1   |        |
| ATM     | EML4      | MET     | SDHA    |        |
| ATRX    | ENO1      | MGMT    | SDHAF1  |        |
| BAG3    | ENO2      | MIB1    | SDHAF2  |        |
| BAI3    | ERBB2     | MKI67   | SDHB    |        |
| BAP1    | ERBB3     | MLH1    | SDHC    |        |
| BCAN    | ERBB4     | MPL     | SDHD    |        |
| BCL2    | ERG       | MSH2    | SELT    |        |
| BRAF    | EZH2      | MSH6    | SETD2   |        |
| BRCA1   | F10       | MUC1    | SLC38A1 |        |
| BRCA2   | FAM123B   | MUC17   | SLC6A2  |        |
| CA12    | FBXW7     | MUC2    | SLTM    |        |
| CA9     | FGFR1     | MUC3A   | SMAD4   |        |
| CALU    | FGFR2     | MUTYH   | SMARCA4 |        |
| CARD11  | FGFR3     | MVP     | SMARCB1 |        |
| CBL     | FH        | MYC     | SMO     |        |
| CCND1   | FHIT      | MYD88   | SMOX    |        |
| CD34    | FLCN      | NAT1    | SMUG1   |        |
| CDC73   | FLT3      | NAT2    | SOCS1   |        |
| CDH1    | FOXL2     | NES     | SRC     |        |
| CDK4    | FZR1      | NF1     | SST     |        |
| CDKN2A  | GATA1     | NF2     | STC1    |        |
| CDX2    | GATA2     | NOTCH1  | STK11   |        |
| CEACAM7 | GATA3     | NOTCH2  | SUFU    |        |
| CEBPA   | GFAP      | NPM1    | SYP     |        |
| CES3    | GNA11     | NRAS    | TCF7L2  |        |
| CHDM    | GNAQ      | PBRM1   | TET2    |        |
| CRLF2   | GNAS      | PCNA    | TFE3    |        |
| CSF1R   | GRP       | PDGFRA  | TFEB    |        |
| CSF3    | GSTM1     | PDZD4   | TMEM97  |        |
| CTNNA1  | HIVEP3    | PGR     | TNFAIP3 |        |
| CTNNB1  | HNF1A     | PHOX2B  | TNFSF13 |        |
| CUL2    | HRAS      | PIK3CA  | TP53    |        |
| CYLD    | IDH1      | PMS2    | TPD52L2 |        |
| CYP1A1  | IDH2      | PPP2R1A | TPM4    |        |
| DAXX    | IFNA1     | PRCC    | TSC1    |        |
| DCC     | IGKV1D-43 | PRKAR1A | TSC2    |        |
| DES     | IL2       | PTCH1   | TSHR    |        |
| DIRAS1  | ITGB5     | PTEN    | TYK2    |        |
| DIRC2   | JAK1      | PTGS2   | VHL     |        |

---

| Sample ID | WHO histotype | Gene symbol | Chromosome | Position  | Ref nt | Change nt | Variant allele frequency | Effect               | AA Change       | Transcript Ensembl ID | Exon # | AA Length | COSMIC/abSNP IDs       | Sift score | Ppr2 score | Interpro domain                                                                                                                                              | Uniprot ID                                            | Sanger seq confirmation |
|-----------|---------------|-------------|------------|-----------|--------|-----------|--------------------------|----------------------|-----------------|-----------------------|--------|-----------|------------------------|------------|------------|--------------------------------------------------------------------------------------------------------------------------------------------------------------|-------------------------------------------------------|-------------------------|
| 1010016   | TC            | HRAS        | chr11      | 533874    | A      | T         | 0.592                    | Missense             | Q61L            | ENST00000451590       | 3      | 189       | COSM99664/rs121913253  | 0.01       | benign     | Small_GTP-binding_protein_domain                                                                                                                             | P01112;P01112                                         | Confirmed               |
| 1010016   | TC            | SDHA        | chr5       | 224571    | G      | T         | 0.151                    | Missense             | A83S            | ENST00000264932       | 3      | 664       |                        | 0.01       | benign     | Fumarate_reductase/succinate_dehydrogenase_B_avoprotein_N                                                                                                    | EPBLJ5,B4DYNS,D6RFM5,P3104,QJ5GQW8                    | Confirmed               |
| 1010016   | TC            | TP53        | chr17      | 7578532   | T      | A         | 0.333                    | Missense             | M133K           | ENST00000289305       | 5      | 393       | COSM437606             | 0          | damaging   | p53_DNA-binding_domain_(1).p53-like_transcription_factor_DNA-binding_(1).p53/RUNT-type_transcription_factor_DNA-binding_domain_(1)                           | B4E095,P04637-2,P04637-3,EPPT15,P04637,Q1MSWB,E7E,QX7 | ND                      |
| 1010016   | AB            | RUNX1       | chr21      | 36171607  | G      | A         | 0.284                    | Nonsense             | R320*           | ENST00000437180       | 8      | 480       | COSM41699              |            |            |                                                                                                                                                              |                                                       | ND                      |
| 1010018   | AB            | TET2        | chr4       | 106156391 | TAGA   | T         | 0.243                    | Frameshift deletion  | E452 del        | ENST00000513237       | 3      | 2023      |                        |            |            |                                                                                                                                                              |                                                       | Confirmed               |
| 1010019   | TNEC          | CTNNB1      | chr3       | 41266137  | C      | G         | 0.416                    | Missense             | S45C            | ENST00000396185       | 3      | 781       | COSM5669/rs121913409   | 0          | damaging   |                                                                                                                                                              | P35222                                                | ND                      |
| 1010024   | TC            | SETD2       | chr3       | 47165698  | TG     | T         | 0.196                    | Frameshift deletion  | H143 fs         | ENST00000409792       | 3      | 2564      |                        |            |            |                                                                                                                                                              |                                                       | Confirmed               |
| 1010024   | TC            | TP53        | chr17      | 7578717   | C      | T         | 0.222                    | Missense             | P27S            | ENST00000289305       | 3      | 393       | COSM1167902            | 0.05       | damaging   | p53_transactivation_domain_(1)                                                                                                                               | E7EMR8,P04637-2,P04637-3,EPPT15,P04637,Q1MSWB,E7E,QX7 | ND                      |
| 1010056   | TC            | CYLD        | chr16      | 50815317  | CTT    | C         | 0.292                    | Frameshift deletion  | L560 fs         | ENST00000311559       | 11     | 956       |                        |            |            |                                                                                                                                                              |                                                       | Confirmed               |
| 1010056   | TC            | DCC         | chr18      | 50731625  | C      | G         | 0.153                    | Missense             | S538C           | ENST00000442544       | 10     | 1447      |                        | 0          | damaging   | Fibronectin_type_III_(4)_immunoglobulin-like_fold_(1)                                                                                                        | E7EQM8,B4DYX2,P43146                                  | Confirmed               |
| 1010075   | B2            | DCC         | chr18      | 50278519  | G      | A         | 0.314                    | Missense             | A63T            | ENST00000442544       | 2      | 1447      |                        | 0.01       | damaging   | Immunoglobulin_subtype_(1)_immunoglobulin-like_(1)_immunoglobulin-like_fold_(1)                                                                              | P43146                                                | Confirmed               |
| 1010075   | B2            | EGFR        | chr7       | 55259554  | CAGA   | C         | 0.233                    | Frameshift deletion  | E871 del        | ENST00000275493       | 21     | 1210      |                        |            |            |                                                                                                                                                              |                                                       | Confirmed               |
| 1010075   | B2            | ERG         | chr21      | 39755553  | CG     | C         | 0.183                    | Frameshift deletion  | P411fs          | ENST00000398919       | 12     | 486       | COSM1414058            |            |            |                                                                                                                                                              |                                                       | ND                      |
| 1010075   | B2            | HRAS        | chr11      | 533548    | G      | A         | 0.228                    | Missense             | D119N           | ENST00000451590       | 4      | 189       | COSM99643              | 0          | damaging   | Small_GTP-binding_protein_domain_(1)                                                                                                                         | P01112-2;P01112                                       | Confirmed               |
| 1010075   | B2            | MAGI1       | chr3       | 65367573  | G      | A         | 0.362                    | Missense             | R894W           | ENST00000402939       | 16     | 1462      | COSM222818             | 0.07       | damaging   |                                                                                                                                                              | ABK18,Q96QZ7-4,Q96QZ7-5,Q96QZ7-2,Q96QZ7-6             | Confirmed               |
| 1010075   | B2            | PRCC        | chr1       | 156761496 | A      | G         | 0.347                    | Missense             | Y364C           | ENST00000271236       | 4      | 491       |                        | 0.04       | damaging   |                                                                                                                                                              | None;Q92733                                           | ND                      |
| 1010075   | B2            | SDHA        | chr5       | 256468    | C      | A         | 0.275                    | Missense             | P643H           | ENST00000264932       | 15     | 664       |                        | 0          | damaging   | Fumarate_reductase/succinate_dehydrogenase_B_avoprotein-like_C-terminal_(1).Fumarate_reductase/succinate_dehydrogenase_avoprotein_C-terminal_(1)_None        | EPBLJ5,B3KYA5,D6RFM5,P3104,QNone                      | Confirmed               |
| 1010075   | B2            | SETD2       | chr3       | 47142948  | C      | T         | 0.384                    | Missense             | G1672E          | ENST00000409792       | 8      | 2564      |                        | 0          | damaging   | SET_domain_(1)                                                                                                                                               | FZ2317,Q9BYW2                                         | Confirmed               |
| 1010075   | B2            | SRC         | chr20      | 36031706  | G      | A         | 0.259                    | Missense             | E513K           | ENST00000260723       | 13     | 536       |                        | 0.01       | benign     | Serine-threonine/tyrosine-protein_kinase_(1).Protein_kinase-like_domain_(1).Tyrosine-protein_kinase_catalytic_domain_(1).Protein_kinase_catalytic_domain_(1) | P12931                                                | ND                      |
| 1010075   | B2            | TP53        | chr17      | 7577139   | G      | A         | 0.237                    | Missense             | R267W           | ENST00000289305       | 8      | 393       | COSM1640829/rs55832599 | 0          | damaging   | p53_DNA-binding_domain_(1).p53-like_transcription_factor_DNA-binding_(1).p53/RUNT-type_transcription_factor_DNA-binding_domain_(1)                           | P04637-2;P04637-3;P04637,Q1MSWB                       | ND                      |
| 1010089   | TC            | BAP1        | chr3       | 52443729  | C      | G         | 0.421                    | Splice site donor    |                 | ENST00000406980       | 2      | 729       |                        |            |            |                                                                                                                                                              |                                                       | Confirmed               |
| 1010089   | TC            | BRC42       | chr13      | 32912496  | A      | T         | 0.286                    | Missense             | E1335V          | ENST00000380152       | 11     | 3418      |                        | 0.01       | damaging   |                                                                                                                                                              | P51567                                                | ND                      |
| 1010089   | TC            | PBRM1       | chr3       | 32588866  | G      | GA        | 0.49                     | Frameshift insertion | L1494 fs        | ENST00000296302       | 27     | 1689      |                        |            |            |                                                                                                                                                              |                                                       | Confirmed               |
| 1010089   | TC            | TP53        | chr17      | 7577538   | C      | T         | 0.447                    | Missense             | R248Q           | ENST00000289305       | 7      | 393       | COSM99020/rs11540652   | 0.01       | damaging   | p53_DNA-binding_domain_(1).p53-like_transcription_factor_DNA-binding_(1).p53/RUNT-type_transcription_factor_DNA-binding_domain_(1)                           | P04637-2;P04637-3;EPPT15,P04637,Q1MSWB,E7E,QX7        | Confirmed               |
| 1010103   | TC            | CYLD        | chr16      | 50815156  | G      | C         | 0.787                    | Splice site acceptor |                 | ENST00000311559       | 11     | 956       |                        |            |            |                                                                                                                                                              |                                                       | Confirmed               |
| 1010103   | TC            | TET2        | chr4       | 106197112 | CAATTA | C         | 0.256                    | Frameshift deletion  | L1816_D1821 del | ENST00000513237       | 11     | 2023      |                        |            |            |                                                                                                                                                              |                                                       | Confirmed               |

|         |    |         |       |           |    |   |       |                      |                |                  |    |      |                     |      |          |                                                                                                                                                                                                                                                                                                                                                                                                                                                                                                                                                                                                                                                                                                                                                                                                                                                                                                                                                                                                                                                                                                                                                                                                                                                                                                                                                                                                                                                                                                                                                                                                                                                                                                                                                                                                                                                                                                                                                                                                                                                                                                                                                                                                                                                                                                                                                                                                                                                                                                                                                                                                                                                                                                                                                                                                                                                                                                                                                                                                                                                                                                                                                                                                                                                                                                                                                                                                                                                                                                                                                                                                                                                                                                                                                                                                                                                                                                                                                                                                                                                                                                                                                                                                                                                                                                                                                                                                                                                                                                                                                                                                                                                                                                                                                                                                                                                                                                                                                                                                                                                                                                                                                                                                                                                                                                                                                                                                                                                                                                                                                                                                                                                                                                                                                                                                                                                                                                                                                                                                                                                                                                                                                                                                                                                                                                                                                                        |                                                         |                                               |           |
|---------|----|---------|-------|-----------|----|---|-------|----------------------|----------------|------------------|----|------|---------------------|------|----------|------------------------------------------------------------------------------------------------------------------------------------------------------------------------------------------------------------------------------------------------------------------------------------------------------------------------------------------------------------------------------------------------------------------------------------------------------------------------------------------------------------------------------------------------------------------------------------------------------------------------------------------------------------------------------------------------------------------------------------------------------------------------------------------------------------------------------------------------------------------------------------------------------------------------------------------------------------------------------------------------------------------------------------------------------------------------------------------------------------------------------------------------------------------------------------------------------------------------------------------------------------------------------------------------------------------------------------------------------------------------------------------------------------------------------------------------------------------------------------------------------------------------------------------------------------------------------------------------------------------------------------------------------------------------------------------------------------------------------------------------------------------------------------------------------------------------------------------------------------------------------------------------------------------------------------------------------------------------------------------------------------------------------------------------------------------------------------------------------------------------------------------------------------------------------------------------------------------------------------------------------------------------------------------------------------------------------------------------------------------------------------------------------------------------------------------------------------------------------------------------------------------------------------------------------------------------------------------------------------------------------------------------------------------------------------------------------------------------------------------------------------------------------------------------------------------------------------------------------------------------------------------------------------------------------------------------------------------------------------------------------------------------------------------------------------------------------------------------------------------------------------------------------------------------------------------------------------------------------------------------------------------------------------------------------------------------------------------------------------------------------------------------------------------------------------------------------------------------------------------------------------------------------------------------------------------------------------------------------------------------------------------------------------------------------------------------------------------------------------------------------------------------------------------------------------------------------------------------------------------------------------------------------------------------------------------------------------------------------------------------------------------------------------------------------------------------------------------------------------------------------------------------------------------------------------------------------------------------------------------------------------------------------------------------------------------------------------------------------------------------------------------------------------------------------------------------------------------------------------------------------------------------------------------------------------------------------------------------------------------------------------------------------------------------------------------------------------------------------------------------------------------------------------------------------------------------------------------------------------------------------------------------------------------------------------------------------------------------------------------------------------------------------------------------------------------------------------------------------------------------------------------------------------------------------------------------------------------------------------------------------------------------------------------------------------------------------------------------------------------------------------------------------------------------------------------------------------------------------------------------------------------------------------------------------------------------------------------------------------------------------------------------------------------------------------------------------------------------------------------------------------------------------------------------------------------------------------------------------------------------------------------------------------------------------------------------------------------------------------------------------------------------------------------------------------------------------------------------------------------------------------------------------------------------------------------------------------------------------------------------------------------------------------------------------------------------------------------------------------------------|---------------------------------------------------------|-----------------------------------------------|-----------|
| 1010103 | TC | TET2    | chr4  | 106183006 | G  | T | 0.471 | Splice site donor    |                | ENST00000513237  | 8  | 2023 | COSM87147           |      |          |                                                                                                                                                                                                                                                                                                                                                                                                                                                                                                                                                                                                                                                                                                                                                                                                                                                                                                                                                                                                                                                                                                                                                                                                                                                                                                                                                                                                                                                                                                                                                                                                                                                                                                                                                                                                                                                                                                                                                                                                                                                                                                                                                                                                                                                                                                                                                                                                                                                                                                                                                                                                                                                                                                                                                                                                                                                                                                                                                                                                                                                                                                                                                                                                                                                                                                                                                                                                                                                                                                                                                                                                                                                                                                                                                                                                                                                                                                                                                                                                                                                                                                                                                                                                                                                                                                                                                                                                                                                                                                                                                                                                                                                                                                                                                                                                                                                                                                                                                                                                                                                                                                                                                                                                                                                                                                                                                                                                                                                                                                                                                                                                                                                                                                                                                                                                                                                                                                                                                                                                                                                                                                                                                                                                                                                                                                                                                                        |                                                         | Confirmed                                     |           |
| 1010109 | TC | ASXL1   | chr20 | 31022297  | C  | A | 0.279 | Nonsense             | C584*          | ENST00000375687  | 13 | 1541 | COSM110708          |      |          |                                                                                                                                                                                                                                                                                                                                                                                                                                                                                                                                                                                                                                                                                                                                                                                                                                                                                                                                                                                                                                                                                                                                                                                                                                                                                                                                                                                                                                                                                                                                                                                                                                                                                                                                                                                                                                                                                                                                                                                                                                                                                                                                                                                                                                                                                                                                                                                                                                                                                                                                                                                                                                                                                                                                                                                                                                                                                                                                                                                                                                                                                                                                                                                                                                                                                                                                                                                                                                                                                                                                                                                                                                                                                                                                                                                                                                                                                                                                                                                                                                                                                                                                                                                                                                                                                                                                                                                                                                                                                                                                                                                                                                                                                                                                                                                                                                                                                                                                                                                                                                                                                                                                                                                                                                                                                                                                                                                                                                                                                                                                                                                                                                                                                                                                                                                                                                                                                                                                                                                                                                                                                                                                                                                                                                                                                                                                                                        |                                                         | Confirmed                                     |           |
| 1010109 | TC | PIK3CA  | chr3  | 178936091 | G  | A | 0.19  | Missense             | E545K          | ENST00000263967  | 10 | 1068 | COSM763_r10488600_3 | 0    | damaging | Phosphoinositide 3-kinase_accessory_PP2K_domain_(3)Armadillo-type_fold_(1)                                                                                                                                                                                                                                                                                                                                                                                                                                                                                                                                                                                                                                                                                                                                                                                                                                                                                                                                                                                                                                                                                                                                                                                                                                                                                                                                                                                                                                                                                                                                                                                                                                                                                                                                                                                                                                                                                                                                                                                                                                                                                                                                                                                                                                                                                                                                                                                                                                                                                                                                                                                                                                                                                                                                                                                                                                                                                                                                                                                                                                                                                                                                                                                                                                                                                                                                                                                                                                                                                                                                                                                                                                                                                                                                                                                                                                                                                                                                                                                                                                                                                                                                                                                                                                                                                                                                                                                                                                                                                                                                                                                                                                                                                                                                                                                                                                                                                                                                                                                                                                                                                                                                                                                                                                                                                                                                                                                                                                                                                                                                                                                                                                                                                                                                                                                                                                                                                                                                                                                                                                                                                                                                                                                                                                                                                             | P42336                                                  | Confirmed                                     |           |
| 1010112 | TC | MEN1    | chr11 | 64577330  | A  | A | 0.381 | Frameshift insertion | S84 fs         | ENST00000394376  | 3  | 615  |                     |      |          |                                                                                                                                                                                                                                                                                                                                                                                                                                                                                                                                                                                                                                                                                                                                                                                                                                                                                                                                                                                                                                                                                                                                                                                                                                                                                                                                                                                                                                                                                                                                                                                                                                                                                                                                                                                                                                                                                                                                                                                                                                                                                                                                                                                                                                                                                                                                                                                                                                                                                                                                                                                                                                                                                                                                                                                                                                                                                                                                                                                                                                                                                                                                                                                                                                                                                                                                                                                                                                                                                                                                                                                                                                                                                                                                                                                                                                                                                                                                                                                                                                                                                                                                                                                                                                                                                                                                                                                                                                                                                                                                                                                                                                                                                                                                                                                                                                                                                                                                                                                                                                                                                                                                                                                                                                                                                                                                                                                                                                                                                                                                                                                                                                                                                                                                                                                                                                                                                                                                                                                                                                                                                                                                                                                                                                                                                                                                                                        |                                                         | Confirmed                                     |           |
| 1010137 | TC | SETD2   | chr3  | 47158121  | C  | G | 0.61  | Missense             | M152H          | ENST00000409792  | 4  | 2564 |                     | 0    | damaging | AWS_(2)                                                                                                                                                                                                                                                                                                                                                                                                                                                                                                                                                                                                                                                                                                                                                                                                                                                                                                                                                                                                                                                                                                                                                                                                                                                                                                                                                                                                                                                                                                                                                                                                                                                                                                                                                                                                                                                                                                                                                                                                                                                                                                                                                                                                                                                                                                                                                                                                                                                                                                                                                                                                                                                                                                                                                                                                                                                                                                                                                                                                                                                                                                                                                                                                                                                                                                                                                                                                                                                                                                                                                                                                                                                                                                                                                                                                                                                                                                                                                                                                                                                                                                                                                                                                                                                                                                                                                                                                                                                                                                                                                                                                                                                                                                                                                                                                                                                                                                                                                                                                                                                                                                                                                                                                                                                                                                                                                                                                                                                                                                                                                                                                                                                                                                                                                                                                                                                                                                                                                                                                                                                                                                                                                                                                                                                                                                                                                                | FZ2317,Q9BYW2                                           | ND                                            |           |
| 1010137 | TC | SETD2   | chr3  | 47164736  | G  | C | 0.637 | Missense             | E464G          | ENST00000409792  | 3  | 2564 |                     | 0    | benign   |                                                                                                                                                                                                                                                                                                                                                                                                                                                                                                                                                                                                                                                                                                                                                                                                                                                                                                                                                                                                                                                                                                                                                                                                                                                                                                                                                                                                                                                                                                                                                                                                                                                                                                                                                                                                                                                                                                                                                                                                                                                                                                                                                                                                                                                                                                                                                                                                                                                                                                                                                                                                                                                                                                                                                                                                                                                                                                                                                                                                                                                                                                                                                                                                                                                                                                                                                                                                                                                                                                                                                                                                                                                                                                                                                                                                                                                                                                                                                                                                                                                                                                                                                                                                                                                                                                                                                                                                                                                                                                                                                                                                                                                                                                                                                                                                                                                                                                                                                                                                                                                                                                                                                                                                                                                                                                                                                                                                                                                                                                                                                                                                                                                                                                                                                                                                                                                                                                                                                                                                                                                                                                                                                                                                                                                                                                                                                                        | FZ2317,Q9BYW2                                           | ND                                            |           |
| 1010137 | TC | SETD2   | chr3  | 47162075  | C  | T | 0.726 | Missense             | D1351N         | ENST00000409792  | 3  | 2564 |                     | 0.21 | benign   |                                                                                                                                                                                                                                                                                                                                                                                                                                                                                                                                                                                                                                                                                                                                                                                                                                                                                                                                                                                                                                                                                                                                                                                                                                                                                                                                                                                                                                                                                                                                                                                                                                                                                                                                                                                                                                                                                                                                                                                                                                                                                                                                                                                                                                                                                                                                                                                                                                                                                                                                                                                                                                                                                                                                                                                                                                                                                                                                                                                                                                                                                                                                                                                                                                                                                                                                                                                                                                                                                                                                                                                                                                                                                                                                                                                                                                                                                                                                                                                                                                                                                                                                                                                                                                                                                                                                                                                                                                                                                                                                                                                                                                                                                                                                                                                                                                                                                                                                                                                                                                                                                                                                                                                                                                                                                                                                                                                                                                                                                                                                                                                                                                                                                                                                                                                                                                                                                                                                                                                                                                                                                                                                                                                                                                                                                                                                                                        | FZ2317,Q9BYW2                                           | Confirmed                                     |           |
| 1010137 | TC | SMARCA4 | chr19 | 11132513  | C  | T | 0.392 | Missense             | T910M          | ENST00000358026  | 19 | 1679 | COSM86025           | 0    | damaging | DEAD-like_helicase_(2)SNF2-related_(1)                                                                                                                                                                                                                                                                                                                                                                                                                                                                                                                                                                                                                                                                                                                                                                                                                                                                                                                                                                                                                                                                                                                                                                                                                                                                                                                                                                                                                                                                                                                                                                                                                                                                                                                                                                                                                                                                                                                                                                                                                                                                                                                                                                                                                                                                                                                                                                                                                                                                                                                                                                                                                                                                                                                                                                                                                                                                                                                                                                                                                                                                                                                                                                                                                                                                                                                                                                                                                                                                                                                                                                                                                                                                                                                                                                                                                                                                                                                                                                                                                                                                                                                                                                                                                                                                                                                                                                                                                                                                                                                                                                                                                                                                                                                                                                                                                                                                                                                                                                                                                                                                                                                                                                                                                                                                                                                                                                                                                                                                                                                                                                                                                                                                                                                                                                                                                                                                                                                                                                                                                                                                                                                                                                                                                                                                                                                                 | B1ABZ6,B1ABZ4,B1ABZ7,Q9HBD4,B1ABZ5,B4E0F1,A7EE21,P51532 | Confirmed                                     |           |
| 1010137 | TC | TP53    | chr17 | 7577093   | C  | G | 0.8   | Missense             | R282P          | ENST00000269305  | 8  | 393  | COSM44306           | 0    | damaging | p53_DNA-binding_domain_(1),p53-like_transcription_factor_DNA-binding_(1),p53/RUN1-type_transcription_factor_DNA-binding_domain_(1)                                                                                                                                                                                                                                                                                                                                                                                                                                                                                                                                                                                                                                                                                                                                                                                                                                                                                                                                                                                                                                                                                                                                                                                                                                                                                                                                                                                                                                                                                                                                                                                                                                                                                                                                                                                                                                                                                                                                                                                                                                                                                                                                                                                                                                                                                                                                                                                                                                                                                                                                                                                                                                                                                                                                                                                                                                                                                                                                                                                                                                                                                                                                                                                                                                                                                                                                                                                                                                                                                                                                                                                                                                                                                                                                                                                                                                                                                                                                                                                                                                                                                                                                                                                                                                                                                                                                                                                                                                                                                                                                                                                                                                                                                                                                                                                                                                                                                                                                                                                                                                                                                                                                                                                                                                                                                                                                                                                                                                                                                                                                                                                                                                                                                                                                                                                                                                                                                                                                                                                                                                                                                                                                                                                                                                     | P04637-2,P04637-3,P04637,Q1MSW8                         | Confirmed                                     |           |
| 1010144 | TC | BAP1    | chr3  | 52438585  | C  | C | 0.389 | Frameshift insertion | A378TW fs      | ENST00000406080  | 12 | 729  |                     |      |          |                                                                                                                                                                                                                                                                                                                                                                                                                                                                                                                                                                                                                                                                                                                                                                                                                                                                                                                                                                                                                                                                                                                                                                                                                                                                                                                                                                                                                                                                                                                                                                                                                                                                                                                                                                                                                                                                                                                                                                                                                                                                                                                                                                                                                                                                                                                                                                                                                                                                                                                                                                                                                                                                                                                                                                                                                                                                                                                                                                                                                                                                                                                                                                                                                                                                                                                                                                                                                                                                                                                                                                                                                                                                                                                                                                                                                                                                                                                                                                                                                                                                                                                                                                                                                                                                                                                                                                                                                                                                                                                                                                                                                                                                                                                                                                                                                                                                                                                                                                                                                                                                                                                                                                                                                                                                                                                                                                                                                                                                                                                                                                                                                                                                                                                                                                                                                                                                                                                                                                                                                                                                                                                                                                                                                                                                                                                                                                        |                                                         | Confirmed                                     |           |
| 1010144 | TC | KIT     | chr4  | 55593589  | T  | G | 0.311 | Inframe deletion     | 553YEVQ556 del | ENST000002088135 | 11 | 976  |                     |      |          |                                                                                                                                                                                                                                                                                                                                                                                                                                                                                                                                                                                                                                                                                                                                                                                                                                                                                                                                                                                                                                                                                                                                                                                                                                                                                                                                                                                                                                                                                                                                                                                                                                                                                                                                                                                                                                                                                                                                                                                                                                                                                                                                                                                                                                                                                                                                                                                                                                                                                                                                                                                                                                                                                                                                                                                                                                                                                                                                                                                                                                                                                                                                                                                                                                                                                                                                                                                                                                                                                                                                                                                                                                                                                                                                                                                                                                                                                                                                                                                                                                                                                                                                                                                                                                                                                                                                                                                                                                                                                                                                                                                                                                                                                                                                                                                                                                                                                                                                                                                                                                                                                                                                                                                                                                                                                                                                                                                                                                                                                                                                                                                                                                                                                                                                                                                                                                                                                                                                                                                                                                                                                                                                                                                                                                                                                                                                                                        | Kinase domain                                           | Confirmed                                     |           |
| 1010148 | TC | NF1     | chr17 | 29652841  | C  | G | 0.161 | Missense             | F1613L         | ENST00000358273  | 37 | 2639 |                     | 0.4  | damaging | Cellular_retinoid_acyl-binding_triple_function_C-terminal_C2Armadillo-type_fold_(1)                                                                                                                                                                                                                                                                                                                                                                                                                                                                                                                                                                                                                                                                                                                                                                                                                                                                                                                                                                                                                                                                                                                                                                                                                                                                                                                                                                                                                                                                                                                                                                                                                                                                                                                                                                                                                                                                                                                                                                                                                                                                                                                                                                                                                                                                                                                                                                                                                                                                                                                                                                                                                                                                                                                                                                                                                                                                                                                                                                                                                                                                                                                                                                                                                                                                                                                                                                                                                                                                                                                                                                                                                                                                                                                                                                                                                                                                                                                                                                                                                                                                                                                                                                                                                                                                                                                                                                                                                                                                                                                                                                                                                                                                                                                                                                                                                                                                                                                                                                                                                                                                                                                                                                                                                                                                                                                                                                                                                                                                                                                                                                                                                                                                                                                                                                                                                                                                                                                                                                                                                                                                                                                                                                                                                                                                                    | Q59FX3,P21359-2,P21359                                  | ND                                            |           |
| 1010148 | TC | NF1     | chr17 | 29556328  | T  | G | 0.271 | Missense             | L899V          | ENST00000358273  | 21 | 2639 | COSM1479419         | 0.13 | damaging | Armadillo-type_fold_(1)                                                                                                                                                                                                                                                                                                                                                                                                                                                                                                                                                                                                                                                                                                                                                                                                                                                                                                                                                                                                                                                                                                                                                                                                                                                                                                                                                                                                                                                                                                                                                                                                                                                                                                                                                                                                                                                                                                                                                                                                                                                                                                                                                                                                                                                                                                                                                                                                                                                                                                                                                                                                                                                                                                                                                                                                                                                                                                                                                                                                                                                                                                                                                                                                                                                                                                                                                                                                                                                                                                                                                                                                                                                                                                                                                                                                                                                                                                                                                                                                                                                                                                                                                                                                                                                                                                                                                                                                                                                                                                                                                                                                                                                                                                                                                                                                                                                                                                                                                                                                                                                                                                                                                                                                                                                                                                                                                                                                                                                                                                                                                                                                                                                                                                                                                                                                                                                                                                                                                                                                                                                                                                                                                                                                                                                                                                                                                | E1P657,P21359-2,P21359                                  | ND                                            |           |
| 1010148 | TC | SETD2   | chr3  | 47108587  | T  | C | 0.639 | Missense             | K2028E         | ENST00000409792  | 13 | 2564 |                     |      |          |                                                                                                                                                                                                                                                                                                                                                                                                                                                                                                                                                                                                                                                                                                                                                                                                                                                                                                                                                                                                                                                                                                                                                                                                                                                                                                                                                                                                                                                                                                                                                                                                                                                                                                                                                                                                                                                                                                                                                                                                                                                                                                                                                                                                                                                                                                                                                                                                                                                                                                                                                                                                                                                                                                                                                                                                                                                                                                                                                                                                                                                                                                                                                                                                                                                                                                                                                                                                                                                                                                                                                                                                                                                                                                                                                                                                                                                                                                                                                                                                                                                                                                                                                                                                                                                                                                                                                                                                                                                                                                                                                                                                                                                                                                                                                                                                                                                                                                                                                                                                                                                                                                                                                                                                                                                                                                                                                                                                                                                                                                                                                                                                                                                                                                                                                                                                                                                                                                                                                                                                                                                                                                                                                                                                                                                                                                                                                                        |                                                         | FZ2317,Q9BYW2                                 | ND        |
| 1010148 | TC | TP53    | chr17 | 7578403   | C  | T | 0.658 | Missense             | C176Y          | ENST00000269305  | 5  | 393  | COSM1649384         | 0    | damaging | p53_DNA-binding_domain_(1),p53-like_transcription_factor_DNA-binding_(1),p53/RUN1-type_transcription_factor_DNA-binding_domain_(1)                                                                                                                                                                                                                                                                                                                                                                                                                                                                                                                                                                                                                                                                                                                                                                                                                                                                                                                                                                                                                                                                                                                                                                                                                                                                                                                                                                                                                                                                                                                                                                                                                                                                                                                                                                                                                                                                                                                                                                                                                                                                                                                                                                                                                                                                                                                                                                                                                                                                                                                                                                                                                                                                                                                                                                                                                                                                                                                                                                                                                                                                                                                                                                                                                                                                                                                                                                                                                                                                                                                                                                                                                                                                                                                                                                                                                                                                                                                                                                                                                                                                                                                                                                                                                                                                                                                                                                                                                                                                                                                                                                                                                                                                                                                                                                                                                                                                                                                                                                                                                                                                                                                                                                                                                                                                                                                                                                                                                                                                                                                                                                                                                                                                                                                                                                                                                                                                                                                                                                                                                                                                                                                                                                                                                                     | B4E095,P04637-2,P04637-3,E9PF15,P04637,Q1MSW8,ETE QX7   | Confirmed                                     |           |
| 1010152 | TC | TP53    | chr17 | 7577580   | T  | C | 0.649 | Missense             | Y234C          | ENST00000269305  | 7  | 393  | COSM10725           | 0    | damaging | p53_DNA-binding_domain_(1),p53-like_transcription_factor_DNA-binding_(1),p53/RUN1-type_transcription_factor_DNA-binding_domain_(1)                                                                                                                                                                                                                                                                                                                                                                                                                                                                                                                                                                                                                                                                                                                                                                                                                                                                                                                                                                                                                                                                                                                                                                                                                                                                                                                                                                                                                                                                                                                                                                                                                                                                                                                                                                                                                                                                                                                                                                                                                                                                                                                                                                                                                                                                                                                                                                                                                                                                                                                                                                                                                                                                                                                                                                                                                                                                                                                                                                                                                                                                                                                                                                                                                                                                                                                                                                                                                                                                                                                                                                                                                                                                                                                                                                                                                                                                                                                                                                                                                                                                                                                                                                                                                                                                                                                                                                                                                                                                                                                                                                                                                                                                                                                                                                                                                                                                                                                                                                                                                                                                                                                                                                                                                                                                                                                                                                                                                                                                                                                                                                                                                                                                                                                                                                                                                                                                                                                                                                                                                                                                                                                                                                                                                                     | P04637-2,P04637-3,E9PF15,P04637,Q1MSW8,ETE QX7          | Confirmed                                     |           |
| 1010153 | TC | ASXL1   | chr20 | 31022615  | T  | A | 0.231 | Nonsense             | Y700*          | ENST00000375687  | 13 | 1541 | COSM133574          |      |          |                                                                                                                                                                                                                                                                                                                                                                                                                                                                                                                                                                                                                                                                                                                                                                                                                                                                                                                                                                                                                                                                                                                                                                                                                                                                                                                                                                                                                                                                                                                                                                                                                                                                                                                                                                                                                                                                                                                                                                                                                                                                                                                                                                                                                                                                                                                                                                                                                                                                                                                                                                                                                                                                                                                                                                                                                                                                                                                                                                                                                                                                                                                                                                                                                                                                                                                                                                                                                                                                                                                                                                                                                                                                                                                                                                                                                                                                                                                                                                                                                                                                                                                                                                                                                                                                                                                                                                                                                                                                                                                                                                                                                                                                                                                                                                                                                                                                                                                                                                                                                                                                                                                                                                                                                                                                                                                                                                                                                                                                                                                                                                                                                                                                                                                                                                                                                                                                                                                                                                                                                                                                                                                                                                                                                                                                                                                                                                        |                                                         | Confirmed                                     |           |
| 1010153 | TC | DNMT3A  | chr2  | 25458691  | TC | T | 0.268 | Frameshift deletion  | F827 fs        | ENST00000321117  | 22 | 912  | COSM53096           |      |          |                                                                                                                                                                                                                                                                                                                                                                                                                                                                                                                                                                                                                                                                                                                                                                                                                                                                                                                                                                                                                                                                                                                                                                                                                                                                                                                                                                                                                                                                                                                                                                                                                                                                                                                                                                                                                                                                                                                                                                                                                                                                                                                                                                                                                                                                                                                                                                                                                                                                                                                                                                                                                                                                                                                                                                                                                                                                                                                                                                                                                                                                                                                                                                                                                                                                                                                                                                                                                                                                                                                                                                                                                                                                                                                                                                                                                                                                                                                                                                                                                                                                                                                                                                                                                                                                                                                                                                                                                                                                                                                                                                                                                                                                                                                                                                                                                                                                                                                                                                                                                                                                                                                                                                                                                                                                                                                                                                                                                                                                                                                                                                                                                                                                                                                                                                                                                                                                                                                                                                                                                                                                                                                                                                                                                                                                                                                                                                        |                                                         | Confirmed                                     |           |
| 1010153 | TC | DNMT3A  | chr2  | 25464666  | T  | G | 0.226 | Missense             | Y683D          | ENST00000321117  | 17 | 912  |                     | 0.01 | damaging |                                                                                                                                                                                                                                                                                                                                                                                                                                                                                                                                                                                                                                                                                                                                                                                                                                                                                                                                                                                                                                                                                                                                                                                                                                                                                                                                                                                                                                                                                                                                                                                                                                                                                                                                                                                                                                                                                                                                                                                                                                                                                                                                                                                                                                                                                                                                                                                                                                                                                                                                                                                                                                                                                                                                                                                                                                                                                                                                                                                                                                                                                                                                                                                                                                                                                                                                                                                                                                                                                                                                                                                                                                                                                                                                                                                                                                                                                                                                                                                                                                                                                                                                                                                                                                                                                                                                                                                                                                                                                                                                                                                                                                                                                                                                                                                                                                                                                                                                                                                                                                                                                                                                                                                                                                                                                                                                                                                                                                                                                                                                                                                                                                                                                                                                                                                                                                                                                                                                                                                                                                                                                                                                                                                                                                                                                                                                                                        | Q9Y6K1,E9PEB8                                           | Confirmed                                     |           |
| 1010153 | TC | TP53    | chr17 | 7575525   | G  | T | 0.541 | Nonsense             | C135*          | ENST00000269305  | 5  | 393  | COSM44319           |      |          |                                                                                                                                                                                                                                                                                                                                                                                                                                                                                                                                                                                                                                                                                                                                                                                                                                                                                                                                                                                                                                                                                                                                                                                                                                                                                                                                                                                                                                                                                                                                                                                                                                                                                                                                                                                                                                                                                                                                                                                                                                                                                                                                                                                                                                                                                                                                                                                                                                                                                                                                                                                                                                                                                                                                                                                                                                                                                                                                                                                                                                                                                                                                                                                                                                                                                                                                                                                                                                                                                                                                                                                                                                                                                                                                                                                                                                                                                                                                                                                                                                                                                                                                                                                                                                                                                                                                                                                                                                                                                                                                                                                                                                                                                                                                                                                                                                                                                                                                                                                                                                                                                                                                                                                                                                                                                                                                                                                                                                                                                                                                                                                                                                                                                                                                                                                                                                                                                                                                                                                                                                                                                                                                                                                                                                                                                                                                                                        |                                                         | Confirmed                                     |           |
| 1010168 | B1 | ASXL1   | chr20 | 31022782  | A  | C | 0.194 | Missense             | D756A          | ENST00000375687  | 13 | 1541 |                     | 0.53 | benign   |                                                                                                                                                                                                                                                                                                                                                                                                                                                                                                                                                                                                                                                                                                                                                                                                                                                                                                                                                                                                                                                                                                                                                                                                                                                                                                                                                                                                                                                                                                                                                                                                                                                                                                                                                                                                                                                                                                                                                                                                                                                                                                                                                                                                                                                                                                                                                                                                                                                                                                                                                                                                                                                                                                                                                                                                                                                                                                                                                                                                                                                                                                                                                                                                                                                                                                                                                                                                                                                                                                                                                                                                                                                                                                                                                                                                                                                                                                                                                                                                                                                                                                                                                                                                                                                                                                                                                                                                                                                                                                                                                                                                                                                                                                                                                                                                                                                                                                                                                                                                                                                                                                                                                                                                                                                                                                                                                                                                                                                                                                                                                                                                                                                                                                                                                                                                                                                                                                                                                                                                                                                                                                                                                                                                                                                                                                                                                                        | A6N26,Q8IKJ9                                            | ND                                            |           |
| 1010168 | B1 | PDGFRA  | chr4  | 55195653  | C  | A | 0.2   | Nonsense             | Y1018*         | ENST00000257290  | 22 | 1089 |                     |      |          |                                                                                                                                                                                                                                                                                                                                                                                                                                                                                                                                                                                                                                                                                                                                                                                                                                                                                                                                                                                                                                                                                                                                                                                                                                                                                                                                                                                                                                                                                                                                                                                                                                                                                                                                                                                                                                                                                                                                                                                                                                                                                                                                                                                                                                                                                                                                                                                                                                                                                                                                                                                                                                                                                                                                                                                                                                                                                                                                                                                                                                                                                                                                                                                                                                                                                                                                                                                                                                                                                                                                                                                                                                                                                                                                                                                                                                                                                                                                                                                                                                                                                                                                                                                                                                                                                                                                                                                                                                                                                                                                                                                                                                                                                                                                                                                                                                                                                                                                                                                                                                                                                                                                                                                                                                                                                                                                                                                                                                                                                                                                                                                                                                                                                                                                                                                                                                                                                                                                                                                                                                                                                                                                                                                                                                                                                                                                                                        |                                                         | ND                                            |           |
| 1010174 | TC | CDKN2A  | chr9  | 21970917  | G  | C | 0.342 | Frameshift insertion | A147 fs        | ENST00000304494  | 2  | 157  | COSM33804           |      |          |                                                                                                                                                                                                                                                                                                                                                                                                                                                                                                                                                                                                                                                                                                                                                                                                                                                                                                                                                                                                                                                                                                                                                                                                                                                                                                                                                                                                                                                                                                                                                                                                                                                                                                                                                                                                                                                                                                                                                                                                                                                                                                                                                                                                                                                                                                                                                                                                                                                                                                                                                                                                                                                                                                                                                                                                                                                                                                                                                                                                                                                                                                                                                                                                                                                                                                                                                                                                                                                                                                                                                                                                                                                                                                                                                                                                                                                                                                                                                                                                                                                                                                                                                                                                                                                                                                                                                                                                                                                                                                                                                                                                                                                                                                                                                                                                                                                                                                                                                                                                                                                                                                                                                                                                                                                                                                                                                                                                                                                                                                                                                                                                                                                                                                                                                                                                                                                                                                                                                                                                                                                                                                                                                                                                                                                                                                                                                                        |                                                         | Confirmed                                     |           |
| 1010174 | TC | TP53    | chr17 | 7578655   | G  | A | 0.42  | Nonsense             | Q331*          | ENST00000269305  | 9  | 393  | COSM288612          |      |          |                                                                                                                                                                                                                                                                                                                                                                                                                                                                                                                                                                                                                                                                                                                                                                                                                                                                                                                                                                                                                                                                                                                                                                                                                                                                                                                                                                                                                                                                                                                                                                                                                                                                                                                                                                                                                                                                                                                                                                                                                                                                                                                                                                                                                                                                                                                                                                                                                                                                                                                                                                                                                                                                                                                                                                                                                                                                                                                                                                                                                                                                                                                                                                                                                                                                                                                                                                                                                                                                                                                                                                                                                                                                                                                                                                                                                                                                                                                                                                                                                                                                                                                                                                                                                                                                                                                                                                                                                                                                                                                                                                                                                                                                                                                                                                                                                                                                                                                                                                                                                                                                                                                                                                                                                                                                                                                                                                                                                                                                                                                                                                                                                                                                                                                                                                                                                                                                                                                                                                                                                                                                                                                                                                                                                                                                                                                                                                        |                                                         | Confirmed                                     |           |
| 1010174 | TC | WT1     | chr11 | 32417949  | T  | A | 0.232 | Missense             | V300E          | ENST00000332351  | 7  | 517  |                     |      |          |                                                                                                                                                                                                                                                                                                                                                                                                                                                                                                                                                                                                                                                                                                                                                                                                                                                                                                                                                                                                                                                                                                                                                                                                                                                                                                                                                                                                                                                                                                                                                                                                                                                                                                                                                                                                                                                                                                                                                                                                                                                                                                                                                                                                                                                                                                                                                                                                                                                                                                                                                                                                                                                                                                                                                                                                                                                                                                                                                                                                                                                                                                                                                                                                                                                                                                                                                                                                                                                                                                                                                                                                                                                                                                                                                                                                                                                                                                                                                                                                                                                                                                                                                                                                                                                                                                                                                                                                                                                                                                                                                                                                                                                                                                                                                                                                                                                                                                                                                                                                                                                                                                                                                                                                                                                                                                                                                                                                                                                                                                                                                                                                                                                                                                                                                                                                                                                                                                                                                                                                                                                                                                                                                                                                                                                                                                                                                                        | None_Wilm&apoptosis_(1),tumour_protein_N-terminal_(1)   | None,P19544-8,P19544,P19544-7,B3KSA5,P19544-6 | Confirmed |
| 1010184 | B3 | PTGS2   | chr1  | 186643487 | A  | G | 0.161 | Stop codon           | T605Q          | ENST00000367468  | 10 | 604  |                     |      |          |                                                                                                                                                                                                                                                                                                                                                                                                                                                                                                                                                                                                                                                                                                                                                                                                                                                                                                                                                                                                                                                                                                                                                                                                                                                                                                                                                                                                                                                                                                                                                                                                                                                                                                                                                                                                                                                                                                                                                                                                                                                                                                                                                                                                                                                                                                                                                                                                                                                                                                                                                                                                                                                                                                                                                                                                                                                                                                                                                                                                                                                                                                                                                                                                                                                                                                                                                                                                                                                                                                                                                                                                                                                                                                                                                                                                                                                                                                                                                                                                                                                                                                                                                                                                                                                                                                                                                                                                                                                                                                                                                                                                                                                                                                                                                                                                                                                                                                                                                                                                                                                                                                                                                                                                                                                                                                                                                                                                                                                                                                                                                                                                                                                                                                                                                                                                                                                                                                                                                                                                                                                                                                                                                                                                                                                                                                                                                                        |                                                         | ND                                            |           |
| 1010188 | TC | APC     | chr5  | 112179388 | T  | A | 0.306 | Missense             | D2690E         | ENST00000268376  | 17 | 2843 |                     |      |          |                                                                                                                                                                                                                                                                                                                                                                                                                                                                                                                                                                                                                                                                                                                                                                                                                                                                                                                                                                                                                                                                                                                                                                                                                                                                                                                                                                                                                                                                                                                                                                                                                                                                                                                                                                                                                                                                                                                                                                                                                                                                                                                                                                                                                                                                                                                                                                                                                                                                                                                                                                                                                                                                                                                                                                                                                                                                                                                                                                                                                                                                                                                                                                                                                                                                                                                                                                                                                                                                                                                                                                                                                                                                                                                                                                                                                                                                                                                                                                                                                                                                                                                                                                                                                                                                                                                                                                                                                                                                                                                                                                                                                                                                                                                                                                                                                                                                                                                                                                                                                                                                                                                                                                                                                                                                                                                                                                                                                                                                                                                                                                                                                                                                                                                                                                                                                                                                                                                                                                                                                                                                                                                                                                                                                                                                                                                                                                        | EB-1_binding_(1)                                        | Q4LE70,P25064                                 | ND        |
| 1010198 | TC | ATM     | chr11 | 108186757 | G  | A | 0.306 | Missense             | E2039K         | ENST00000452508  | 43 | 3056 | COSM1561120         | 0    | damaging | PKC-related_kinase_(1),Armadillo-type_fold_(1)                                                                                                                                                                                                                                                                                                                                                                                                                                                                                                                                                                                                                                                                                                                                                                                                                                                                                                                                                                                                                                                                                                                                                                                                                                                                                                                                                                                                                                                                                                                                                                                                                                                                                                                                                                                                                                                                                                                                                                                                                                                                                                                                                                                                                                                                                                                                                                                                                                                                                                                                                                                                                                                                                                                                                                                                                                                                                                                                                                                                                                                                                                                                                                                                                                                                                                                                                                                                                                                                                                                                                                                                                                                                                                                                                                                                                                                                                                                                                                                                                                                                                                                                                                                                                                                                                                                                                                                                                                                                                                                                                                                                                                                                                                                                                                                                                                                                                                                                                                                                                                                                                                                                                                                                                                                                                                                                                                                                                                                                                                                                                                                                                                                                                                                                                                                                                                                                                                                                                                                                                                                                                                                                                                                                                                                                                                                         | Q13315                                                  | ND                                            |           |
| 1010198 | TC | ATM     | chr11 | 108115727 | C  | T | 0.384 | Missense             | P282L          | ENST00000452508  | 8  | 3056 | COSM1350746         | 0    | damaging | Armadillo-type_fold_(1)                                                                                                                                                                                                                                                                                                                                                                                                                                                                                                                                                                                                                                                                                                                                                                                                                                                                                                                                                                                                                                                                                                                                                                                                                                                                                                                                                                                                                                                                                                                                                                                                                                                                                                                                                                                                                                                                                                                                                                                                                                                                                                                                                                                                                                                                                                                                                                                                                                                                                                                                                                                                                                                                                                                                                                                                                                                                                                                                                                                                                                                                                                                                                                                                                                                                                                                                                                                                                                                                                                                                                                                                                                                                                                                                                                                                                                                                                                                                                                                                                                                                                                                                                                                                                                                                                                                                                                                                                                                                                                                                                                                                                                                                                                                                                                                                                                                                                                                                                                                                                                                                                                                                                                                                                                                                                                                                                                                                                                                                                                                                                                                                                                                                                                                                                                                                                                                                                                                                                                                                                                                                                                                                                                                                                                                                                                                                                | Q13315                                                  | ND                                            |           |
| 1010198 | TC | OCC     | chr18 | 50977010  | C  | T | 0.437 | Missense             | R1124C         | ENST00000442544  | 23 | 1447 |                     |      |          |                                                                                                                                                                                                                                                                                                                                                                                                                                                                                                                                                                                                                                                                                                                                                                                                                                                                                                                                                                                                                                                                                                                                                                                                                                                                                                                                                                                                                                                                                                                                                                                                                                                                                                                                                                                                                                                                                                                                                                                                                                                                                                                                                                                                                                                                                                                                                                                                                                                                                                                                                                                                                                                                                                                                                                                                                                                                                                                                                                                                                                                                                                                                                                                                                                                                                                                                                                                                                                                                                                                                                                                                                                                                                                                                                                                                                                                                                                                                                                                                                                                                                                                                                                                                                                                                                                                                                                                                                                                                                                                                                                                                                                                                                                                                                                                                                                                                                                                                                                                                                                                                                                                                                                                                                                                                                                                                                                                                                                                                                                                                                                                                                                                                                                                                                                                                                                                                                                                                                                                                                                                                                                                                                                                                                                                                                                                                                                        |                                                         | P43146                                        | ND        |
| 1010198 | TC | EML4    | chr2  | 42509964  | T  | C | 0.321 | Missense             | Y276H          | ENST00000401738  | 9  | 992  |                     |      |          |                                                                                                                                                                                                                                                                                                                                                                                                                                                                                                                                                                                                                                                                                                                                                                                                                                                                                                                                                                                                                                                                                                                                                                                                                                                                                                                                                                                                                                                                                                                                                                                                                                                                                                                                                                                                                                                                                                                                                                                                                                                                                                                                                                                                                                                                                                                                                                                                                                                                                                                                                                                                                                                                                                                                                                                                                                                                                                                                                                                                                                                                                                                                                                                                                                                                                                                                                                                                                                                                                                                                                                                                                                                                                                                                                                                                                                                                                                                                                                                                                                                                                                                                                                                                                                                                                                                                                                                                                                                                                                                                                                                                                                                                                                                                                                                                                                                                                                                                                                                                                                                                                                                                                                                                                                                                                                                                                                                                                                                                                                                                                                                                                                                                                                                                                                                                                                                                                                                                                                                                                                                                                                                                                                                                                                                                                                                                                                        | HELP_(1),Quinoliprotein_alcohol_dehydrogenase-like_(1)  | B5MCW9,Q9HC35                                 | ND        |
| 1010198 | TC | FLCN    | chr17 | 17119708  | TG | T | 0.208 | Frameshift deletion  | H429fs         | ENST00000285071  | 11 | 579  | r80338683           |      |          |                                                                                                                                                                                                                                                                                                                                                                                                                                                                                                                                                                                                                                                                                                                                                                                                                                                                                                                                                                                                                                                                                                                                                                                                                                                                                                                                                                                                                                                                                                                                                                                                                                                                                                                                                                                                                                                                                                                                                                                                                                                                                                                                                                                                                                                                                                                                                                                                                                                                                                                                                                                                                                                                                                                                                                                                                                                                                                                                                                                                                                                                                                                                                                                                                                                                                                                                                                                                                                                                                                                                                                                                                                                                                                                                                                                                                                                                                                                                                                                                                                                                                                                                                                                                                                                                                                                                                                                                                                                                                                                                                                                                                                                                                                                                                                                                                                                                                                                                                                                                                                                                                                                                                                                                                                                                                                                                                                                                                                                                                                                                                                                                                                                                                                                                                                                                                                                                                                                                                                                                                                                                                                                                                                                                                                                                                                                                                                        |                                                         |                                               | ND        |
| 1010198 | TC | MLH1    | chr3  | 37089163  | G  | T | 0.442 | Nonsense             | E629*          | ENST00000231790  | 16 | 756  |                     |      |          |                                                                                                                                                                                                                                                                                                                                                                                                                                                                                                                                                                                                                                                                                                                                                                                                                                                                                                                                                                                                                                                                                                                                                                                                                                                                                                                                                                                                                                                                                                                                                                                                                                                                                                                                                                                                                                                                                                                                                                                                                                                                                                                                                                                                                                                                                                                                                                                                                                                                                                                                                                                                                                                                                                                                                                                                                                                                                                                                                                                                                                                                                                                                                                                                                                                                                                                                                                                                                                                                                                                                                                                                                                                                                                                                                                                                                                                                                                                                                                                                                                                                                                                                                                                                                                                                                                                                                                                                                                                                                                                                                                                                                                                                                                                                                                                                                                                                                                                                                                                                                                                                                                                                                                                                                                                                                                                                                                                                                                                                                                                                                                                                                                                                                                                                                                                                                                                                                                                                                                                                                                                                                                                                                                                                                                                                                                                                                                        |                                                         | ND                                            |           |
| 1010198 | TC | NES     | chr1  | 156642803 | TG | T | 0.225 | Frameshift deletion  | P392 fs        | ENST00000368223  | 4  | 1621 | COSM1334916         |      |          |                                                                                                                                                                                                                                                                                                                                                                                                                                                                                                                                                                                                                                                                                                                                                                                                                                                                                                                                                                                                                                                                                                                                                                                                                                                                                                                                                                                                                                                                                                                                                                                                                                                                                                                                                                                                                                                                                                                                                                                                                                                                                                                                                                                                                                                                                                                                                                                                                                                                                                                                                                                                                                                                                                                                                                                                                                                                                                                                                                                                                                                                                                                                                                                                                                                                                                                                                                                                                                                                                                                                                                                                                                                                                                                                                                                                                                                                                                                                                                                                                                                                                                                                                                                                                                                                                                                                                                                                                                                                                                                                                                                                                                                                                                                                                                                                                                                                                                                                                                                                                                                                                                                                                                                                                                                                                                                                                                                                                                                                                                                                                                                                                                                                                                                                                                                                                                                                                                                                                                                                                                                                                                                                                                                                                                                                                                                                                                        |                                                         |                                               | ND        |
| 1010198 | TC | NF2     | chr22 | 30000022  | G  | C | 0.474 | Frameshift deletion  | S12 del        | ENST00000338641  | 1  | 595  | COSM22361           |      |          |                                                                                                                                                                                                                                                                                                                                                                                                                                                                                                                                                                                                                                                                                                                                                                                                                                                                                                                                                                                                                                                                                                                                                                                                                                                                                                                                                                                                                                                                                                                                                                                                                                                                                                                                                                                                                                                                                                                                                                                                                                                                                                                                                                                                                                                                                                                                                                                                                                                                                                                                                                                                                                                                                                                                                                                                                                                                                                                                                                                                                                                                                                                                                                                                                                                                                                                                                                                                                                                                                                                                                                                                                                                                                                                                                                                                                                                                                                                                                                                                                                                                                                                                                                                                                                                                                                                                                                                                                                                                                                                                                                                                                                                                                                                                                                                                                                                                                                                                                                                                                                                                                                                                                                                                                                                                                                                                                                                                                                                                                                                                                                                                                                                                                                                                                                                                                                                                                                                                                                                                                                                                                                                                                                                                                                                                                                                                                                        |                                                         |                                               | ND        |
| 1010198 | TC | TCF7L2  | chr10 | 114912188 | C  | T | 0.241 | Missense             | R420W          | ENST00000545257  | 11 | 619  | COSM1560964         | 0    | damaging | High_mobility_group_C2ZKWA,C2ZLJ8,C2ZLJ9,C2ZLJ10,C2ZLJ11,C2ZLJ12,C2ZLJ13,C2ZLJ14,C2ZLJ15,C2ZLJ16,C2ZLJ17,C2ZLJ18,C2ZLJ19,C2ZLJ20,C2ZLJ21,C2ZLJ22,C2ZLJ23,C2ZLJ24,C2ZLJ25,C2ZLJ26,C2ZLJ27,C2ZLJ28,C2ZLJ29,C2ZLJ30,C2ZLJ31,C2ZLJ32,C2ZLJ33,C2ZLJ34,C2ZLJ35,C2ZLJ36,C2ZLJ37,C2ZLJ38,C2ZLJ39,C2ZLJ40,C2ZLJ41,C2ZLJ42,C2ZLJ43,C2ZLJ44,C2ZLJ45,C2ZLJ46,C2ZLJ47,C2ZLJ48,C2ZLJ49,C2ZLJ50,C2ZLJ51,C2ZLJ52,C2ZLJ53,C2ZLJ54,C2ZLJ55,C2ZLJ56,C2ZLJ57,C2ZLJ58,C2ZLJ59,C2ZLJ60,C2ZLJ61,C2ZLJ62,C2ZLJ63,C2ZLJ64,C2ZLJ65,C2ZLJ66,C2ZLJ67,C2ZLJ68,C2ZLJ69,C2ZLJ70,C2ZLJ71,C2ZLJ72,C2ZLJ73,C2ZLJ74,C2ZLJ75,C2ZLJ76,C2ZLJ77,C2ZLJ78,C2ZLJ79,C2ZLJ80,C2ZLJ81,C2ZLJ82,C2ZLJ83,C2ZLJ84,C2ZLJ85,C2ZLJ86,C2ZLJ87,C2ZLJ88,C2ZLJ89,C2ZLJ90,C2ZLJ91,C2ZLJ92,C2ZLJ93,C2ZLJ94,C2ZLJ95,C2ZLJ96,C2ZLJ97,C2ZLJ98,C2ZLJ99,C2ZLJ100,C2ZLJ101,C2ZLJ102,C2ZLJ103,C2ZLJ104,C2ZLJ105,C2ZLJ106,C2ZLJ107,C2ZLJ108,C2ZLJ109,C2ZLJ110,C2ZLJ111,C2ZLJ112,C2ZLJ113,C2ZLJ114,C2ZLJ115,C2ZLJ116,C2ZLJ117,C2ZLJ118,C2ZLJ119,C2ZLJ120,C2ZLJ121,C2ZLJ122,C2ZLJ123,C2ZLJ124,C2ZLJ125,C2ZLJ126,C2ZLJ127,C2ZLJ128,C2ZLJ129,C2ZLJ130,C2ZLJ131,C2ZLJ132,C2ZLJ133,C2ZLJ134,C2ZLJ135,C2ZLJ136,C2ZLJ137,C2ZLJ138,C2ZLJ139,C2ZLJ140,C2ZLJ141,C2ZLJ142,C2ZLJ143,C2ZLJ144,C2ZLJ145,C2ZLJ146,C2ZLJ147,C2ZLJ148,C2ZLJ149,C2ZLJ150,C2ZLJ151,C2ZLJ152,C2ZLJ153,C2ZLJ154,C2ZLJ155,C2ZLJ156,C2ZLJ157,C2ZLJ158,C2ZLJ159,C2ZLJ160,C2ZLJ161,C2ZLJ162,C2ZLJ163,C2ZLJ164,C2ZLJ165,C2ZLJ166,C2ZLJ167,C2ZLJ168,C2ZLJ169,C2ZLJ170,C2ZLJ171,C2ZLJ172,C2ZLJ173,C2ZLJ174,C2ZLJ175,C2ZLJ176,C2ZLJ177,C2ZLJ178,C2ZLJ179,C2ZLJ180,C2ZLJ181,C2ZLJ182,C2ZLJ183,C2ZLJ184,C2ZLJ185,C2ZLJ186,C2ZLJ187,C2ZLJ188,C2ZLJ189,C2ZLJ190,C2ZLJ191,C2ZLJ192,C2ZLJ193,C2ZLJ194,C2ZLJ195,C2ZLJ196,C2ZLJ197,C2ZLJ198,C2ZLJ199,C2ZLJ200,C2ZLJ201,C2ZLJ202,C2ZLJ203,C2ZLJ204,C2ZLJ205,C2ZLJ206,C2ZLJ207,C2ZLJ208,C2ZLJ209,C2ZLJ210,C2ZLJ211,C2ZLJ212,C2ZLJ213,C2ZLJ214,C2ZLJ215,C2ZLJ216,C2ZLJ217,C2ZLJ218,C2ZLJ219,C2ZLJ220,C2ZLJ221,C2ZLJ222,C2ZLJ223,C2ZLJ224,C2ZLJ225,C2ZLJ226,C2ZLJ227,C2ZLJ228,C2ZLJ229,C2ZLJ230,C2ZLJ231,C2ZLJ232,C2ZLJ233,C2ZLJ234,C2ZLJ235,C2ZLJ236,C2ZLJ237,C2ZLJ238,C2ZLJ239,C2ZLJ240,C2ZLJ241,C2ZLJ242,C2ZLJ243,C2ZLJ244,C2ZLJ245,C2ZLJ246,C2ZLJ247,C2ZLJ248,C2ZLJ249,C2ZLJ250,C2ZLJ251,C2ZLJ252,C2ZLJ253,C2ZLJ254,C2ZLJ255,C2ZLJ256,C2ZLJ257,C2ZLJ258,C2ZLJ259,C2ZLJ260,C2ZLJ261,C2ZLJ262,C2ZLJ263,C2ZLJ264,C2ZLJ265,C2ZLJ266,C2ZLJ267,C2ZLJ268,C2ZLJ269,C2ZLJ270,C2ZLJ271,C2ZLJ272,C2ZLJ273,C2ZLJ274,C2ZLJ275,C2ZLJ276,C2ZLJ277,C2ZLJ278,C2ZLJ279,C2ZLJ280,C2ZLJ281,C2ZLJ282,C2ZLJ283,C2ZLJ284,C2ZLJ285,C2ZLJ286,C2ZLJ287,C2ZLJ288,C2ZLJ289,C2ZLJ290,C2ZLJ291,C2ZLJ292,C2ZLJ293,C2ZLJ294,C2ZLJ295,C2ZLJ296,C2ZLJ297,C2ZLJ298,C2ZLJ299,C2ZLJ300,C2ZLJ301,C2ZLJ302,C2ZLJ303,C2ZLJ304,C2ZLJ305,C2ZLJ306,C2ZLJ307,C2ZLJ308,C2ZLJ309,C2ZLJ310,C2ZLJ311,C2ZLJ312,C2ZLJ313,C2ZLJ314,C2ZLJ315,C2ZLJ316,C2ZLJ317,C2ZLJ318,C2ZLJ319,C2ZLJ320,C2ZLJ321,C2ZLJ322,C2ZLJ323,C2ZLJ324,C2ZLJ325,C2ZLJ326,C2ZLJ327,C2ZLJ328,C2ZLJ329,C2ZLJ330,C2ZLJ331,C2ZLJ332,C2ZLJ333,C2ZLJ334,C2ZLJ335,C2ZLJ336,C2ZLJ337,C2ZLJ338,C2ZLJ339,C2ZLJ340,C2ZLJ341,C2ZLJ342,C2ZLJ343,C2ZLJ344,C2ZLJ345,C2ZLJ346,C2ZLJ347,C2ZLJ348,C2ZLJ349,C2ZLJ350,C2ZLJ351,C2ZLJ352,C2ZLJ353,C2ZLJ354,C2ZLJ355,C2ZLJ356,C2ZLJ357,C2ZLJ358,C2ZLJ359,C2ZLJ360,C2ZLJ361,C2ZLJ362,C2ZLJ363,C2ZLJ364,C2ZLJ365,C2ZLJ366,C2ZLJ367,C2ZLJ368,C2ZLJ369,C2ZLJ370,C2ZLJ371,C2ZLJ372,C2ZLJ373,C2ZLJ374,C2ZLJ375,C2ZLJ376,C2ZLJ377,C2ZLJ378,C2ZLJ379,C2ZLJ380,C2ZLJ381,C2ZLJ382,C2ZLJ383,C2ZLJ384,C2ZLJ385,C2ZLJ386,C2ZLJ387,C2ZLJ388,C2ZLJ389,C2ZLJ390,C2ZLJ391,C2ZLJ392,C2ZLJ393,C2ZLJ394,C2ZLJ395,C2ZLJ396,C2ZLJ397,C2ZLJ398,C2ZLJ399,C2ZLJ400,C2ZLJ401,C2ZLJ402,C2ZLJ403,C2ZLJ404,C2ZLJ405,C2ZLJ406,C2ZLJ407,C2ZLJ408,C2ZLJ409,C2ZLJ410,C2ZLJ411,C2ZLJ412,C2ZLJ413,C2ZLJ414,C2ZLJ415,C2ZLJ416,C2ZLJ417,C2ZLJ418,C2ZLJ419,C2ZLJ420,C2ZLJ421,C2ZLJ422,C2ZLJ423,C2ZLJ424,C2ZLJ425,C2ZLJ426,C2ZLJ427,C2ZLJ428,C2ZLJ429,C2ZLJ430,C2ZLJ431,C2ZLJ432,C2ZLJ433,C2ZLJ434,C2ZLJ435,C2ZLJ436,C2ZLJ437,C2ZLJ438,C2ZLJ439,C2ZLJ440,C2ZLJ441,C2ZLJ442,C2ZLJ443,C2ZLJ444,C2ZLJ445,C2ZLJ446,C2ZLJ447,C2ZLJ448,C2ZLJ449,C2ZLJ450,C2ZLJ451,C2ZLJ452,C2ZLJ453,C2ZLJ454,C2ZLJ455,C2ZLJ456,C2ZLJ457,C2ZLJ458,C2ZLJ459,C2ZLJ460,C2ZLJ461,C2ZLJ462,C2ZLJ463,C2ZLJ464,C2ZLJ465,C2ZLJ466,C2ZLJ467,C2ZLJ468,C2ZLJ469,C2ZLJ470,C2ZLJ471,C2ZLJ472,C2ZLJ473,C2ZLJ474,C2ZLJ475,C2ZLJ476,C2ZLJ477,C2ZLJ478,C2ZLJ479,C2ZLJ480,C2ZLJ481,C2ZLJ482,C2ZLJ483,C2ZLJ484,C2ZLJ485,C2ZLJ486,C2ZLJ487,C2ZLJ488,C2ZLJ489,C2ZLJ490,C2ZLJ491,C2ZLJ492,C2ZLJ493,C2ZLJ494,C2ZLJ495,C2ZLJ496,C2ZLJ497,C2ZLJ498,C2ZLJ499,C2ZLJ500,C2ZLJ501,C2ZLJ502,C2ZLJ503,C2ZLJ504,C2ZLJ505,C2ZLJ506,C2ZLJ507,C2ZLJ508,C2ZLJ509,C2ZLJ510,C2ZLJ511,C2ZLJ512,C2ZLJ513,C2ZLJ514,C2ZLJ515,C2ZLJ516,C2ZLJ517,C2ZLJ518,C2ZLJ519,C2ZLJ520,C2ZLJ521,C2ZLJ522,C2ZLJ523,C2ZLJ524,C2ZLJ525,C2ZLJ526,C2ZLJ527,C2ZLJ528,C2ZLJ529,C2ZLJ530,C2ZLJ531,C2ZLJ532,C2ZLJ533,C2ZLJ534,C2ZLJ535,C2ZLJ536,C2ZLJ537,C2ZLJ538,C2ZLJ539,C2ZLJ540,C2ZLJ541,C2ZLJ542,C2ZLJ543,C2ZLJ544,C2ZLJ545,C2ZLJ546,C2ZLJ547,C2ZLJ548,C2ZLJ549,C2ZLJ550,C2ZLJ551,C2ZLJ552,C2ZLJ553,C2ZLJ554,C2ZLJ555,C2ZLJ556,C2ZLJ557,C2ZLJ558,C2ZLJ559,C2ZLJ560,C2ZLJ561,C2ZLJ562,C2ZLJ563,C2ZLJ564,C2ZLJ565,C2ZLJ566,C2ZLJ567,C2ZLJ568,C2ZLJ569,C2ZLJ570,C2ZLJ571,C2ZLJ572,C2ZLJ573,C2ZLJ574,C2ZLJ575,C2ZLJ576,C2ZLJ577,C2ZLJ578,C2ZLJ579,C2ZLJ580,C2ZLJ581,C2ZLJ582,C2ZLJ583,C2ZLJ584,C2ZLJ585,C2ZLJ586,C2ZLJ587,C2ZLJ588,C2ZLJ589,C2ZLJ590,C2ZLJ591,C2ZLJ592,C2ZLJ593,C2ZLJ594,C2ZLJ595,C2ZLJ596,C2ZLJ597,C2ZLJ598,C2ZLJ599,C2ZLJ600,C2ZLJ601,C2ZLJ602,C2ZLJ603,C2ZLJ604,C2ZLJ605,C2ZLJ606,C2ZLJ607,C2ZLJ608,C2ZLJ609,C2ZLJ610,C2ZLJ611,C2ZLJ612,C2ZLJ613,C2ZLJ614,C2ZLJ615,C2ZLJ616,C2ZLJ617,C2ZLJ618,C2ZLJ619,C2ZLJ620,C2ZLJ621,C2ZLJ622,C2ZLJ623,C2ZLJ624,C2ZLJ625,C2ZLJ626,C2ZLJ627,C2ZLJ628,C2ZLJ629,C2ZLJ630,C2ZLJ631,C2ZLJ632,C2ZLJ633,C2ZLJ634,C2ZLJ635,C2ZLJ636,C2ZLJ637,C2ZLJ638,C2ZLJ639,C2ZLJ640,C2ZLJ641,C2ZLJ642,C2ZLJ643,C2ZLJ644,C2ZLJ645,C2ZLJ646,C2ZLJ647,C2ZLJ648,C2ZLJ649,C2ZLJ650,C2ZLJ651,C2ZLJ652,C2ZLJ653,C2ZLJ654,C2ZLJ655,C2ZLJ656,C2ZLJ657,C2ZLJ658,C2ZLJ659,C2ZLJ660,C2ZLJ661,C2ZLJ662,C2ZLJ663,C2ZLJ664,C2ZLJ665,C2ZLJ666,C2ZLJ667,C2ZLJ668,C2ZLJ669,C2ZLJ670,C2ZLJ671,C2ZLJ672,C2ZLJ673,C2ZLJ674,C2ZLJ675,C2ZLJ676,C2ZLJ677,C2ZLJ678,C2ZLJ679,C2ZLJ680,C2ZLJ681,C2ZLJ682,C2ZLJ683,C2ZLJ684,C2ZLJ685,C2ZLJ686,C2ZLJ687,C2ZLJ688,C2ZLJ689,C2ZLJ690,C2ZLJ691,C2ZLJ692,C2ZLJ693,C2ZLJ694,C2 |                                                         |                                               |           |



**Table S3.** Summary of CYLD somatic variations in thymic carcinomas

| Sample ID | Positions on chr 16 | Ref nt           | Change nt | Effect               | AA Change            | Transcript Ensembl ID | AA Length | Sift score | Source          |
|-----------|---------------------|------------------|-----------|----------------------|----------------------|-----------------------|-----------|------------|-----------------|
| 1010056   | 50815317            | CTT              | C         | Frameshift deletion  | L560 fs              | ENST00000311559       | 956       |            | this study      |
| 1010103   | 50815156            | G                | C         | Splice site acceptor |                      | ENST00000311559       | 956       |            | this study      |
| 1010363   | 50820823            | GCATCAG<br>GATTT | G         | Frameshift deletion  | 667EAASG<br>F672 del | ENST00000311559       | 956       |            | this study      |
| 1010376   | 50783936            | G                | T         | Missense             | R109S                | ENST00000311559       | 956       | 0          | this study      |
| P-Thy002  | 50784106            | A                | G         | Missesense           | E166G                | ENST00000569681       | 956       | 0.002      | Nature Genetics |
| P-Thy002  | 50826571            | A                | T         | Missesense           | I584F                | ENST00000568704       | 956       | 0.005      | Nature Genetics |
| P-Thy002  | 50828337            | A                | G         | Missesense           | D710G                | ENST00000568704       | 956       | 0.197      | Nature Genetics |
| N-Thy011  | 50813914            | C                | T         | Nonsense             | Q490X                | ENST00000566206       | 956       |            | Nature Genetics |
| N-Thy004  | 50818352            | CT               | -CT       | Frame shift indel    | G462fs               | ENST00000568704       | 956       |            | Nature Genetics |

ref nt, reference nucleotide; AA, amino acid; ID, identification number.  
Nature Genetics, 46, 8, 844-9, 2014



Table S5. Pathway enrichment scores

| Pathway                    | Significant | q-value     | p-value     |
|----------------------------|-------------|-------------|-------------|
| Chromatin Modification     | TRUE        | 2.86E-17    | 6.78E-18    |
| DNA Damage Control         | TRUE        | 2.57E-11    | 1.22E-11    |
| PI3K                       | TRUE        | 1.43E-09    | 1.02E-09    |
| RAS                        | TRUE        | 1.49E-09    | 1.42E-09    |
| Apoptosis                  | TRUE        | 1.02E-07    | 1.21E-07    |
| APC                        | TRUE        | 1.02E-06    | 1.45E-06    |
| Transcriptional Regulation | TRUE        | 0.010291726 | 0.019554279 |
| STAT                       | TRUE        | 0.010291726 | 0.019554279 |
| MAPK                       | FALSE       | 0.350877193 | 1           |
| TGF-b                      | FALSE       | 0.350877193 | 1           |
| NOTCH                      | FALSE       | 0.350877193 | 1           |
| HH                         | FALSE       | 0.350877193 | 1           |

q values were calculated from the empirical p values of bootstrap estimation method (see Method section)
